# Supplementary material for: Using nutation-frequency-selective pulses to reduce radio-frequency field inhomogeneity in solid-state NMR
Source: Copernicus journal article supplement (doi:10.5194/mr-2020-18), 2020-07-21
Supplement: Supplementary file 1 [file mr-2020-18-supplement.pdf]

# Supporting Information

## **Using nutation-frequency-selective pulses to reduce radio-frequency field inhomogeneity in solid-state NMR**

5 Kathrin Aebischer<sup>1</sup>, Nino Wili<sup>1</sup>, Zdeněk Tošner<sup>2</sup>, Matthias Ernst<sup>1</sup>

<sup>1</sup>Physical Chemistry, ETH Zürich, Vladimir-Prelog-Weg 2, 8093 Zürich, Switzerland

<sup>2</sup>Department of Chemistry, Faculty of Science, Charles University, Hlavova 8, 12842 Prague 2, Czech Republic

*Correspondence to:* Matthias Ernst (maer@ethz.ch)

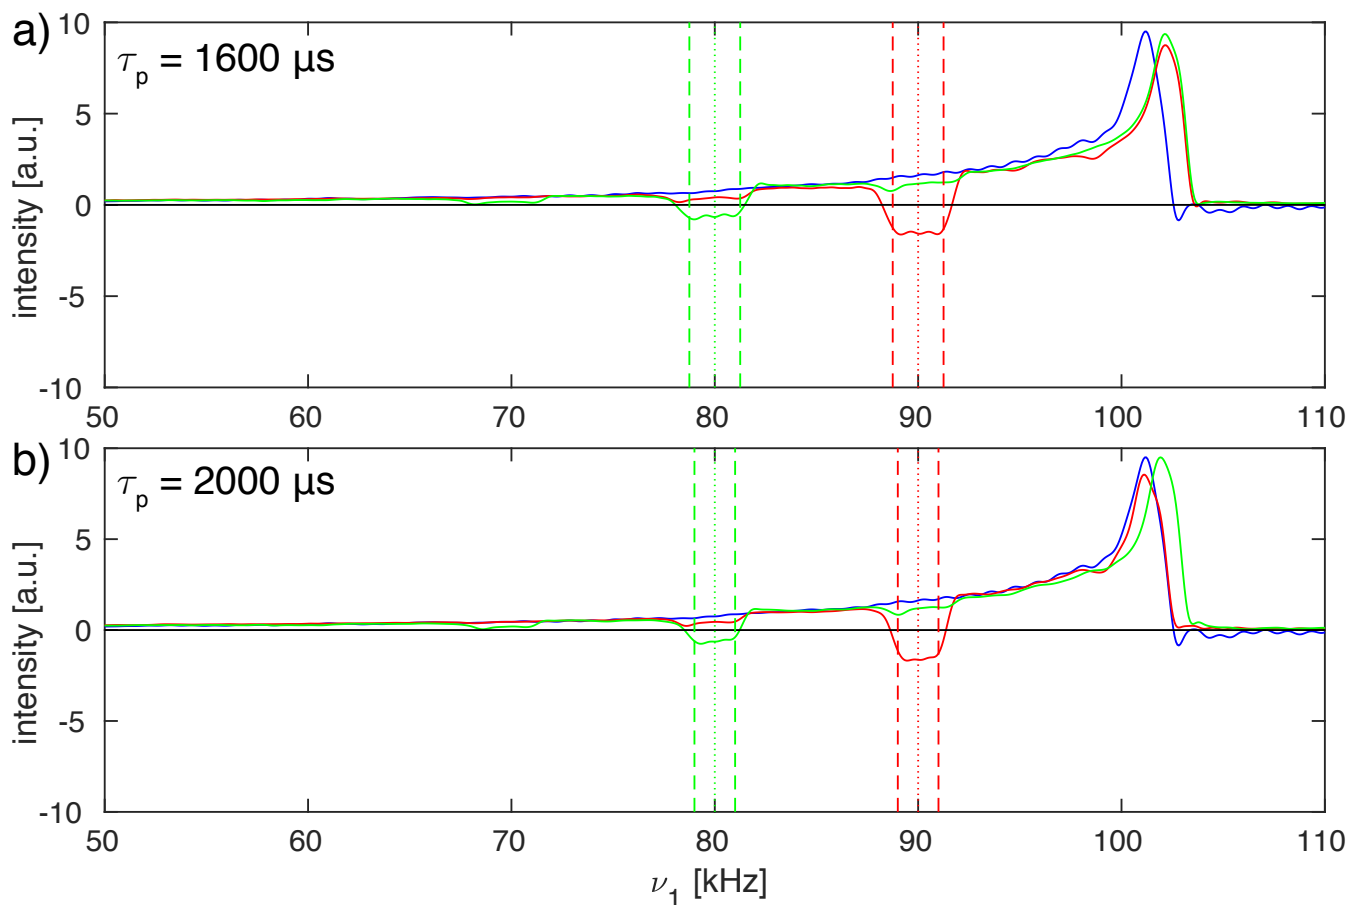

**Figure S01:** Proton nutation spectra of adamantane spinning at 10 kHz at 600 MHz proton resonance frequency using a Bruker 2.5 mm MAS probe. In blue, a standard nutation experiment is shown with a nominal rf-field amplitude of 100 kHz determined by the zero-crossing of a  $5 \mu\text{s}$   $\pi$  pulse. The nutation spectra in green and red were preceded by an I-BURP-2 pulse of length a)  $1600 \mu\text{s}$ , b)  $2000 \mu\text{s}$  using a modulation frequency of 80 kHz (green) and 90 kHz (red), respectively. In contrast to Fig. 4 in the main paper, there is only a very small shift in the theoretical and experimental inversion ranges. However, one can clearly see that there are temporal shifts of the maximum nutation frequency over the course of the measurements which show up as shifts of the peak of the nutation spectrum. In addition, sidebands of the inversion profiles spaced by the MAS frequency are visible.

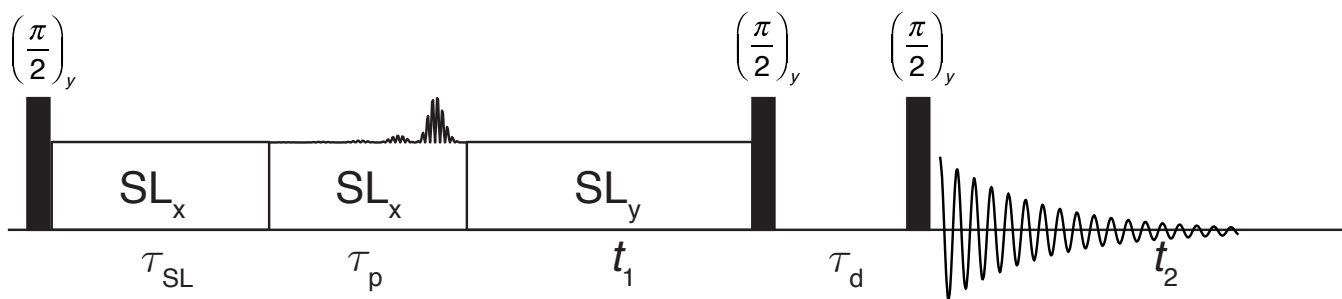

30 **Figure S02:** Schematic representation of the pulse sequence used for testing of the inversion properties of the I-BURP-2 pulse in the spin-lock frame with an additional spin-lock period before the inversion pulse. After the initial  $90^\circ$  pulse, the magnetization is spin locked along x for a time  $\tau_{SL}$  and the modulated I-BURP-2 inversion pulse is applied afterwards along y. During the subsequent  $t_1$  time the magnetization nutates about the field along y. To obtain pure-phase spectra, a z filter with a dephasing delay is used to select a single component after the nutation. Difference spectra can be obtained by replacing the I-BURP-2 pulse in the spin-lock frame with a simple spinlock in alternating scans while shifting the receiver phase by  $180^\circ$ .

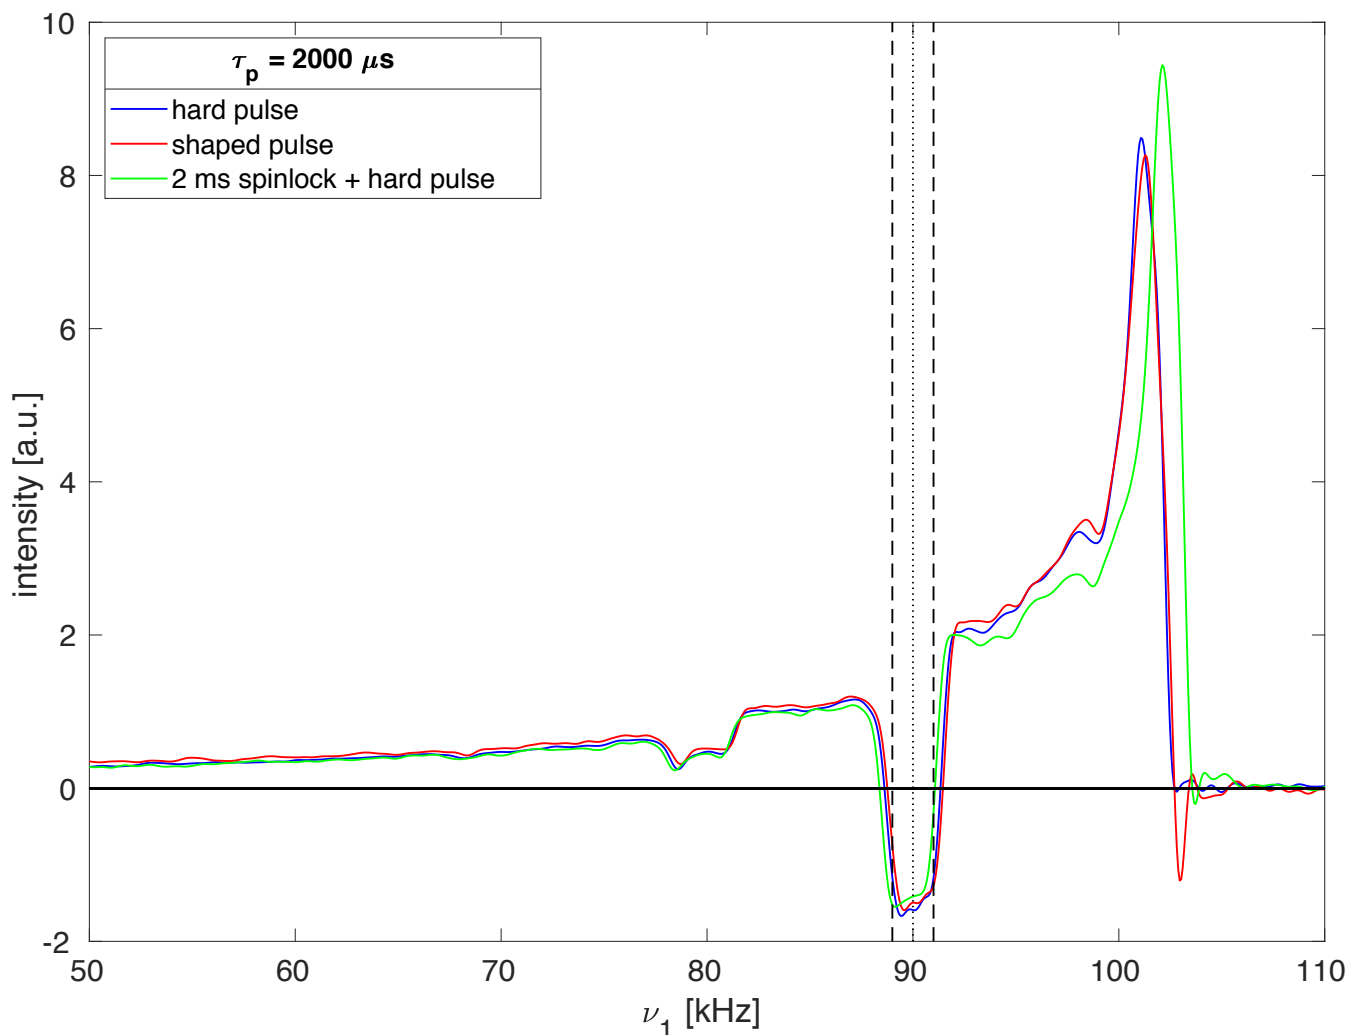

35 **Figure S03:** Proton nutation spectra of adamantane spinning at 10 kHz at 600 MHz proton resonance frequency using a Bruker 2.5 mm  
 MAS probe. The nutation spectra were preceded by an I-BURP-2 pulse of length 2000  $\mu\text{s}$  using a modulation frequency of 90 kHz. The  
 nutation spectra were recorded using a hard pulse (blue and green spectra) while the nutation was implemented using a Bruker shaped pulse  
 at 50% amplitude (red spectrum) with a scaling of the rf power by a factor of four. For the red spectrum, a spin-lock pulse of 2 ms was added  
 before the I-BURP-2 pulse (see Fig. S02 for the pulse sequence). One can clearly see shifts of the maximum of the nutation spectrum  
 40 depending on presence or absence of the additional spin-lock pulse. This is a known problem with current-generation Bruker power  
 amplifiers and can explain the shift of the inverted area between theory and experiments as observed in Fig. 4 of the main paper.

**Table S1:** Experimental parameters of the homonuclear decoupling measurements shown in the paper.

| Proton<br>Resonance<br>Frequency<br>[MHz] | Sample                                                                 | Figure   | Points: $t_1$ | Spectral<br>Width $t_1$<br>[kHz] | Points: $t_2$ | Spectral<br>Width $t_2$<br>[kHz] | No. of<br>Scans |
|-------------------------------------------|------------------------------------------------------------------------|----------|---------------|----------------------------------|---------------|----------------------------------|-----------------|
| 500                                       | Glycine                                                                | Fig. 7a) | 512           | 12.5                             | 1024          | 200                              | 8               |
| 500                                       | $\beta$ -Asp-Ala                                                       | Fig. 7b) | 768           | 12.5                             | 1024          | 200                              | 8               |
| 500                                       | L-histidine·HCl·H <sub>2</sub> O                                       | Fig. 7c) | 512           | 15.6                             | 1024          | 200                              | 8               |
| 600                                       | L-histidine·HCl·H <sub>2</sub> O<br>(carrier at edge of<br>spectrum)   | Fig. 8   | 512           | 20.8                             | 1024          | 200                              | 8               |
| 600                                       | L-histidine·HCl·H <sub>2</sub> O<br>(carrier in centre of<br>spectrum) | Fig. 8   | 350           | 10.5                             | 1024          | 200                              | 16              |

## Matlab Processing Scripts

### 2D Nutation Experiments

```
50 %proc_nutation_kaab.m
   %K. Aebischer, 10.06.20

   %Script to process raw data of 2D nutation experiment
   %based on proc_nutation.m by M. Ernst

55 %Path to include proc_fid.m
   addpath(' ../processing_scripts')

   %Parameters
60 input_file = './200622_His_nutation_600MHz/5/ser';

   td2 = 1024;           %time domain direct dimension
   td1 = 512;            %time domain indirect dimension
   si2 = 4096;           %zero-filling direct dimension
65 si1 = 4096;           %zero-filling indirect dimension

   swh1 = 1/(3.5e-6);    %Hz, spectral width indirect dimension
   swh2 = 200000;        %Hz, spectral width direct dimension

70 %Phase correction
   p0_2 = -58;           %zero order direct dimension
   p1_2 = -3;            %first order direct dimension
   p0_1 = 90;            %zero order indirect dimension
   p1_1 = 90;            %first order indirect dimension

75 %Read data from input file
   fid = fopen(input_file,'r','l');
   a = fread(fid,2*td1*td2,'int32');
   fclose(fid);

80 %Reshape into 2D array
   a1 = reshape(a,2*td2,td1);
   a2 = zeros(td2,td1);
   %Combine to complex number
85 for k=1:td1
       a2(:,k) = a1(1:2:end,k) + 1i*a1(2:2:end,k);
   end

   %Process FIDs in direct dimension
90 a2p=zeros(si2,td1);
   for k = 1:td1
       [a2p(:,k), ~] = proc_fid(a2(1:end,k), swh2, si2, 0, p0_2, p1_2, 2, 2, si2/2, 76);
   end

95 %FT along indirect dimension
   %discard imaginary part
   %sum over relevant part in omega_2
   [spectrum, frq_ax] = proc_fid(sum(real(a2p(900:3000, :))), swh1, si1, 0, p0_1, p1_1, 2, 2);
```

## 2D FSLG Experiments

```
100 %proc_pmlg_kaab.m
    %K. Aebischer 19.06.20

    %Script to process raw data of 2D homonuclear decoupled proton spectra

105 %Path to include prod_fid.m
    addpath('../processing_scripts')

    %Parameters
    input_file = './200626_AlaAsp_PMLG/20/ser';
110 td2 = 1024;          %time domain direct dimension
    td1 = 512;          %time domain indirect dimension
    si2 = 4096;         %zero-filling direct dimension
    si1 = 4096;         %zero-filling indirect dimension
    swh1 = 12.5e3;      %spectral width indirect dimension, Hz
115 swh2 = 200e3;       %spectral width direct dimension, Hz

    %Phase correction
    p0_2 = 110;         %zero order direct dimension
    p1_2 = 3;          %first order direct dimension
120 p0_1 = 90;         %zero order indirect dimension
    p1_1 = 0;          %first order indirect dimension

    %Read data from input file
    fid = fopen(input_file,'r','l');
125 a = fread(fid,2*td1*td2,'int32');
    fclose(fid);

    %Reshape into 2D array
    a1=reshape(a,2*td2,td1);
130 a2 = zeros(td2,td1);
    %Combine to complex number
    for k=1:td1
        a2(:,k) = a1(1:2:end,k)+1i*a1(2:2:end,k);
    end
135

    %Process FIDs in direct dimension
    a2p=zeros(si2,td1);
    for k=1:td1
140 [a2p(:,k), ~] = proc_fid(a2(:,k),swh2,si2,0,p0_2,p1_2,0,2,2048,76);
    end

    %Sum of relevant part in omega_2
    alfr = sum(real(a2p(600:3400, :)));
    alfc = alfr(1:2:td1)+1i*alfr(2:2:td1);
145

    %FT along second dimension
    [spectrum, frq_ax] = proc_fid(alfc,swh1,si1,0,p0_1,p1_1,2,2);
```

```

function [data_ft, frq_ax] = proc_fid(data,sw,zf,lb,phase0, phase1, basl, win, zp, fs)
%K. Aebischer, 10.06.20
%based on phase1.m by M. Ernst
%Function for basic processing of FID signal including zero-filling,
155 %baseline and phase correction and apodization
%[data_ft, frq_ax] = proc_fid(data,sw,zf,lb,phase0, phase1, basl, win, zp, fs)
%
%Input
160 %data:      array with FID datapoints
%sw:         spectral width in Hz
%zf:         Zero-filling
%lb:         line-broadening (Hz) for exponential multiplication
%phase0:     deg, 0 order phase correction
165 %phase1:    deg, 1st order phase correction
%basl:       option for baseline correction (0: none, 1: on FID, 2: FID and spectrum)
%win:        apodization window (0: exponential, else: cos^2)
%zp:         zero-point for first order phase correction (point index)
%fs:         Shift FID by fs points (protection delay)
%Output:
170 %data_ft:   spectrum of FID
%frq_ax:     frequency axis of spectrum in Hz

data=data(:).';           %ensures data is a row vector
dw = 1/sw;                %dwell time (time-res. of FID)
175 l=length(data);

%Check input arguments
%set default values if no argument given
180 if nargin < 3
    zf=1;
end
if nargin < 4
    lb=0;
end
185 if nargin < 5
    phase0=0;
end
if nargin < 6
    phase1=0;
190 end
if nargin < 7
    basl=0;
end
if nargin < 8
    win=0;
195 end
if nargin < 9
    zp=zf/2;
end
200 if nargin < 10
    fs=0;
end

```



```

205 phase1 = phase1-fs*180;
    if zf==0
        zf = 1;
    end

    %Offset correction FID
    %takes the last 20% of the FID and corrects by mean value
    if bas1 > 0
        offset = mean(data(round(0.8*1):1));
        data(fs+1:1) = data(fs+1:1) - offset;
    end

215 %Apodization
    if win == 0
        %exponential window
        apod = ones(1,1);
220         apod(fs+1:1) = exp(-lb*(0:(1-(fs+1)))*dw*pi);
    else
        %cos^2 window
        apod = ones(1,1);
        apod(fs+1:1) = cos((0:(1-(fs+1)))/(1-(fs+1))*pi/2).^2;
225     end
    data = data .* apod;
    data(1)=0.5*data(1);

    %Fourier tranform FID
230     data_ft = fftshift(fft(data,zf));

    %0 order phase correction
    data_ft = data_ft * exp(-1i*pi/180*phase0);

235     %1st order phase correction
    x = (((0:(zf-1))-zp+zf/2)/zf)-0.5;
    frq_ax = x*sw;
    data_ft = data_ft .* exp(-1i*pi/180*2*x*phase1);

240     %Offset correction for spectrum
    if bas1 > 1
        %use edge of spectral width for baseline correction
        offset = mean(data_ft(round(0.1*1):round(0.2*1)));
        data_ft = data_ft - offset;
245     end

    end
    %end of function

```

250
